# Supplementary material
Source: bioRxiv or medRxiv preprint supplement (https://www.biorxiv.org/highwire/filestream/140291/field_highwire_adjunct_files/0/466839-1.pdf)
Supplement: Supplementary file [file 466839-1.pdf]

# Supplementary Figures

## An Analysis of Characterized Plant Sesquiterpene Synthases

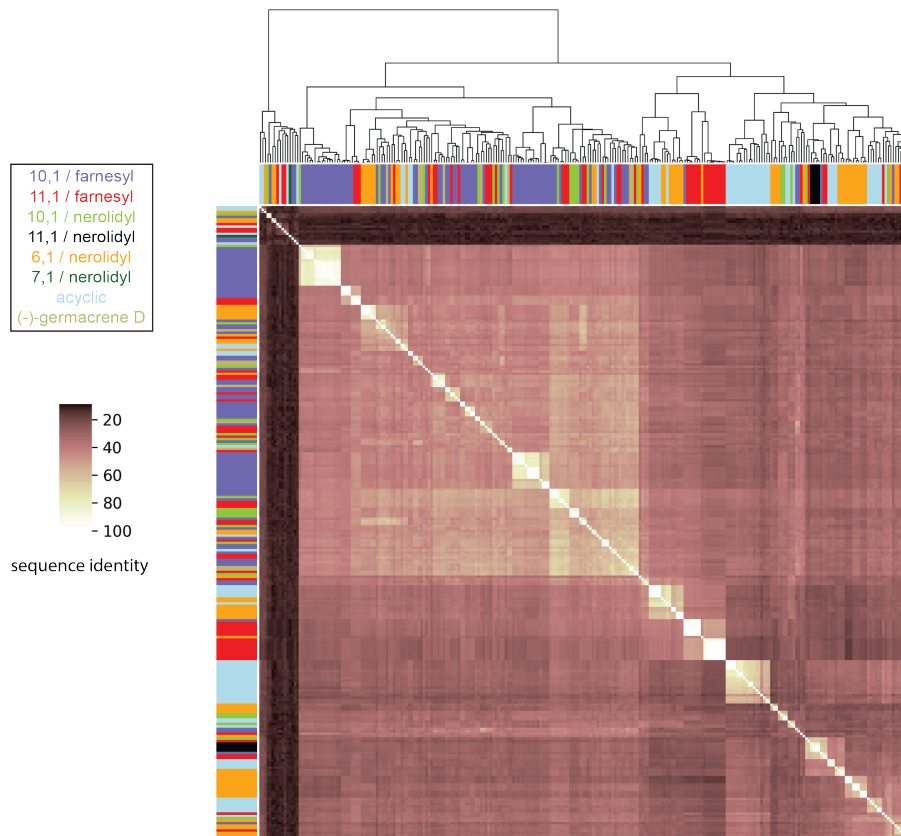

Figure S1: Visualization of C-terminal domain sequence identities between pairs of enzymes in the database. Colours on axes represent the major product precursor cations of the respective enzymes.

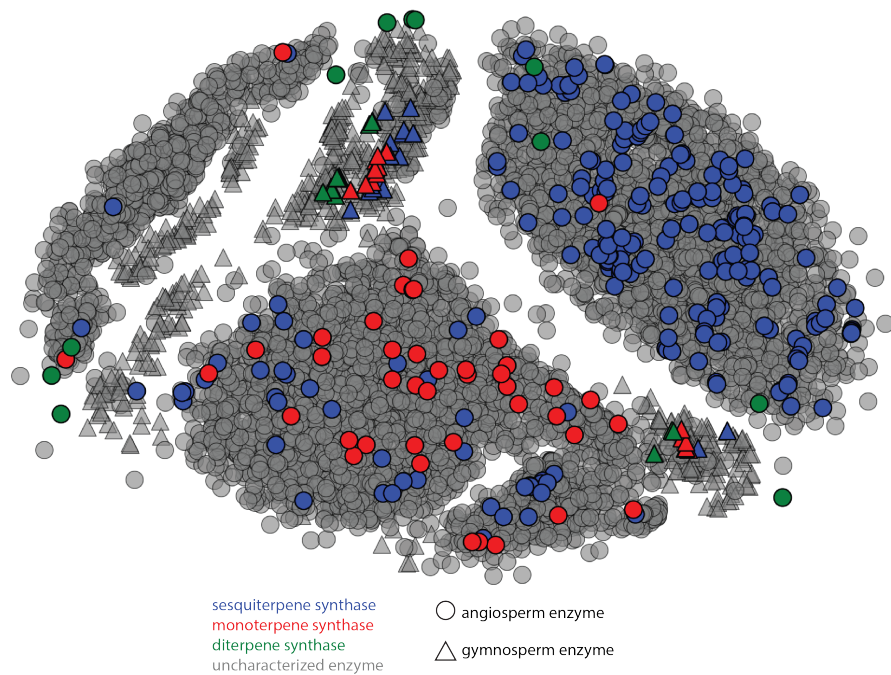

Figure S2: MDS plot of terpene synthase C-terminal domain sub-sequences with coloring based on substrate. Unknown proteins which are likely to be terpene synthases are shown in gray. Sequences which are similar to each other are closer together in the plot.
